# Supplementary material for: Circulating Tumor Cell Clusters Are Frequently Detected in Women with Early-Stage Breast Cancer
Source: MDPI journal article supplement (doi:10.3390/cancers13102356), 2021-05-13
Supplement: s1 [file s1]

Supplementary Materials

# Circulating Tumor Cell Clusters are Frequently Detected in Women with Early-Stage Breast Cancer

Carolina Reduzzi <sup>1,2,†</sup>, Serena Di Cosimo <sup>1,†</sup>, Lorenzo Gerratana <sup>2,3,4</sup>, Rosita Motta <sup>1</sup>, Antonia Martinetti <sup>5</sup>, Andrea Vingiani <sup>6</sup>, Paolo D'Amico <sup>2,7</sup>, Youbin Zhang <sup>2</sup>, Marta Vismara <sup>1</sup>, Catherine Depretto <sup>8</sup>, Gianfranco Scaperrotta <sup>8</sup>, Secondo Folli <sup>9</sup>, Giancarlo Pruneri <sup>6</sup>, Massimo Cristofanilli <sup>2</sup>, Maria Grazia Daidone <sup>1</sup> and Vera Cappelletti <sup>1,\*</sup>

- <sup>1</sup> Department of Applied Research and Technological Development, Fondazione IRCCS Istituto Nazionale dei Tumori di Milano, 20133 Milan, Italy; carolina.reduzzi@northwestern.edu (C.R.); serena.dicosimo@istitutotumori.mi.it (S.D.C.); rosita.motta@istitutotumori.mi.it (R.M.); marta.vismara@istitutotumori.mi.it (M.V.); mariagrazia.daidone@istitutotumori.mi.it (M.G.D.)
- <sup>2</sup> Department of Medicine-Hematology and Oncology, Robert H. Lurie Comprehensive Cancer Center, Feinberg School of Medicine, Northwestern University, Chicago, IL, 60611 USA; lorenzo.gerratana@northwestern.edu (L.G.); paolo.damico@northwestern.edu (P.D.); youbin.zhang1@northwestern.edu (Y.Z.); Massimo.cristofanilli@nm.org (M.C.)
- <sup>3</sup> Department of Medicine (DAME), University of Udine, 33100 Udine, Italy
- <sup>4</sup> Department of Medical Oncology, Centro di Riferimento Oncologico di Aviano (CRO) IRCCS, 33081 Aviano, Italy
- <sup>5</sup> Medical Oncology Unit, Fondazione IRCCS Istituto Nazionale dei Tumori, 20133 Milan, Italy; Antonia.Martinetti@istitutotumori.mi.it
- <sup>6</sup> Pathology Department, School of Medicine, Fondazione IRCCS Istituto Nazionale Tumori and University of Milan, 20133 Milan, Italy; Andrea.Vingiani@istitutotumori.mi.it (A.V.); Giancarlo.Pruneri@istitutotumori.mi.it (G.P.)
- <sup>7</sup> New Drugs and Early Drug Development for Innovative Therapies Division, IEO, European Institute of Oncology IRCCS, 20133 Milan, Italy
- <sup>8</sup> Department of Radiology, Fondazione IRCCS Istituto Nazionale dei Tumori di Milano, 20133 Milan, Italy; Catherine.Depretto@istitutotumori.mi.it (C.D.); Gianfranco.Scaperrotta@istitutotumori.mi.it (G.S.)
- <sup>9</sup> Breast Cancer Unit, Fondazione IRCCS Istituto Nazionale dei Tumori di Milano, 20133 Milan, Italy; Secondo.Folli@istitutotumori.mi.it
- \* Correspondence: vera.cappelletti@istitutotumori.mi.it; Tel.: +39-022390-2700
- † Equally contributed.

**Citation:** Reduzzi, C.; Cosimo, S.D.; Gerratana, L.; Motta, R.; Martinetti, A.; Vingiani, A.; D'Amico, P.; Zhang, Y.; Vismara, M.; Depretto, C.; et al. Circulating Tumor Cell Clusters are Frequently Detected in Women with Early-Stage Breast Cancer. *Cancers* **2021**, *13*, 2356. <https://doi.org/10.3390/cancers13102356>

Academic Editor: Antonio Russo

Received: 29 January 2021

Accepted: 10 May 2021

Published: 13 May 2021

**Publisher's Note:** MDPI stays neutral with regard to jurisdictional claims in published maps and institutional affiliations.

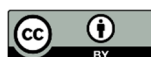

**Copyright:** © 2021 by the authors. Submitted for possible open access publication under the terms and conditions of the Creative Commons Attribution (CC BY) license (<https://creativecommons.org/licenses/by/4.0/>).

**Table S1.** Clinico-pathological characteristics of the patients' cohort for technological comparison.

|                                      | N  | %    |
|--------------------------------------|----|------|
| <b>Histology</b>                     |    |      |
| • Ductal                             | 10 | 62.5 |
| • Lobular                            | 6  | 37.5 |
| <b>Disease type at screening</b>     |    |      |
| • Visceral                           | 12 | 75.0 |
| • Nonvisceral                        | 4  | 25.0 |
| <b>Hormone receptor status</b>       |    |      |
| • ER -positive, PgR positive or both | 11 | 68.8 |
| • ER-negative and PgR-negative       | 5  | 31.2 |
| <b>HER2 status</b>                   |    |      |
| • Positive                           | 1  | 6.2  |
| • Negative                           | 15 | 93.8 |

**Table S2.** CTC-cluster count in samples processed in parallel with CellSearch and CellSieve filters.

| Sample ID | CellSearch        | CellSieve         |                   |
|-----------|-------------------|-------------------|-------------------|
|           | CK <sup>pos</sup> | CK <sup>pos</sup> | CK <sup>neg</sup> |
| 1         | 0                 | 8                 | 6                 |
| 2         | 1                 | 4                 | 5                 |
| 3         | 1                 | 3                 | 5                 |
| 4         | 2                 | 6                 | 5                 |
| 5         | 108               | 112               | NE                |
| 6         | 0                 | 5                 | 2                 |
| 7         | 0                 | 5                 | 3                 |
| 8         | 7                 | 0                 | 1                 |
| 9         | 1                 | 2                 | 3                 |
| 10        | 0                 | 0                 | 0                 |
| 11        | 2                 | 0                 | 0                 |
| 12        | 0                 | 1                 | 1                 |
| 13        | 0                 | 1                 | 0                 |
| 14        | 0                 | 1                 | 0                 |
| 15        | 0                 | 0                 | 0                 |
| 16        | 2                 | 6                 | 2                 |
| 17        | 0                 | 1                 | 2                 |
| 18        | 8                 | 15                | 0                 |
| 19        | 25                | 24                | 1                 |

NE = Not evaluable due to the high number of cells on the filter.

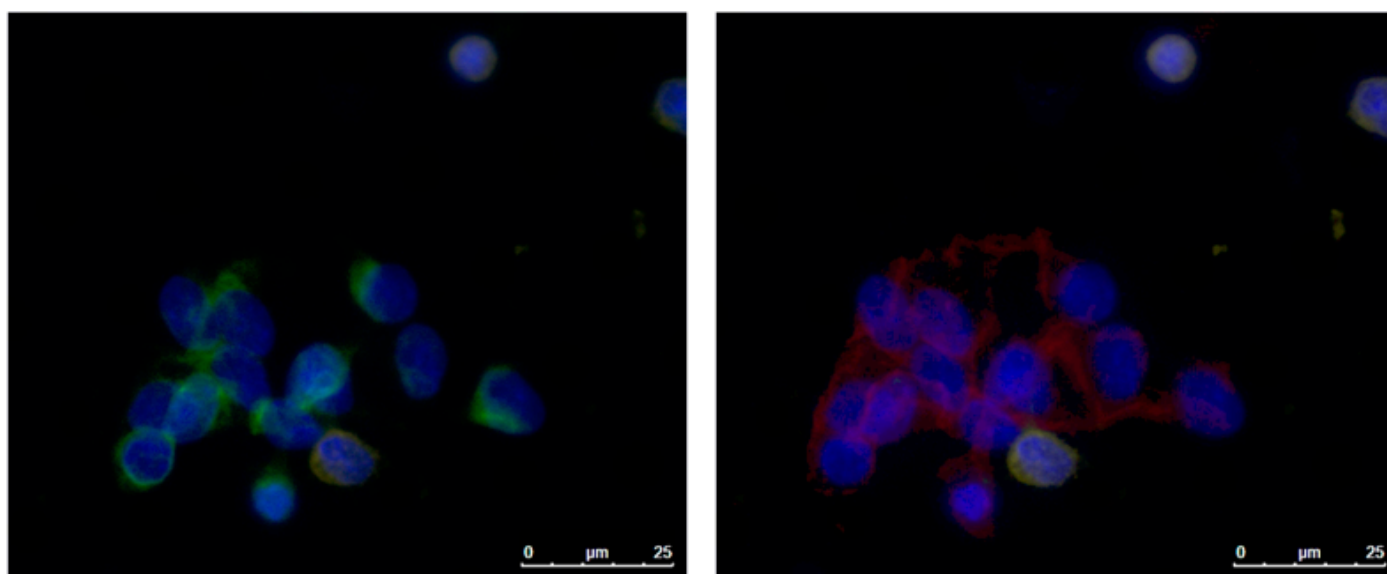

**Figure S1.** CTC-clusters expressing CD31. Representative image of a CTC-cluster showing expression of both CK (left panel; green = CK, blue = DAPI) and CD31 (right panel; red = CD31). Apart from one blood cell expressing CD45 (in yellow), the rest of the cells forming the cluster are CD45<sup>neg</sup>.

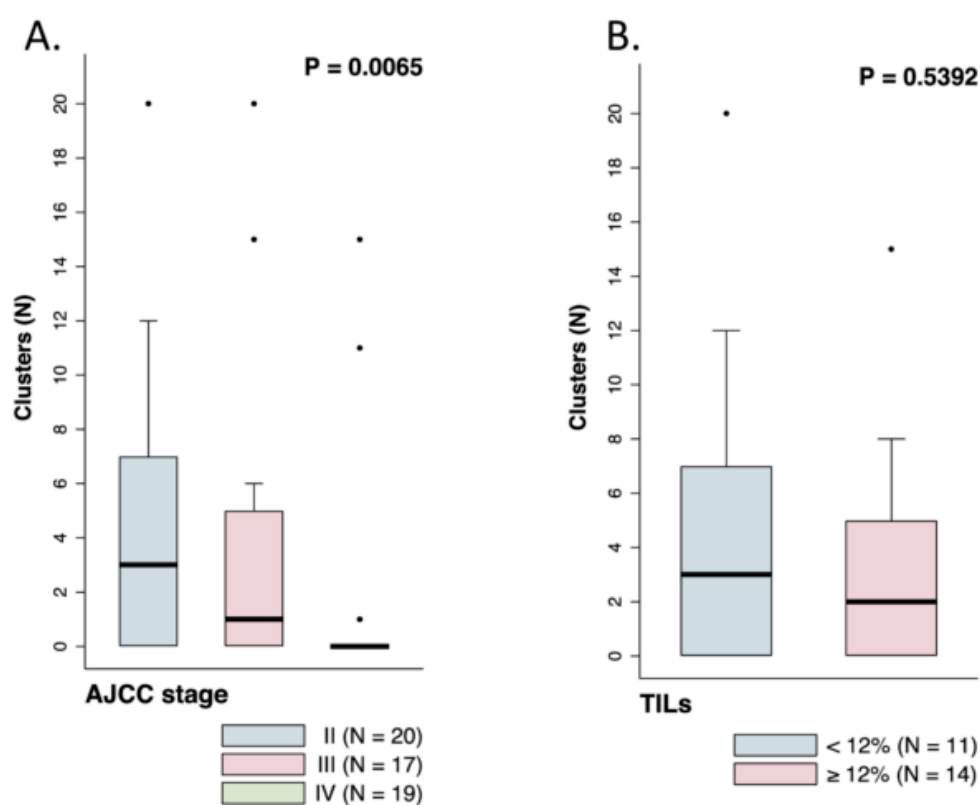

**Figure S2.** Association of CTC-clusters with clinico-pathological characteristics in patients with EBC. Boxplots reporting the number of CTC-clusters detected in baseline samples, according to patients' AJCC stage (A) and to tumor infiltrating lymphocytes (TILs) rates (low = <12%; high = ≥12%) evaluated at the primary tumor site (B).

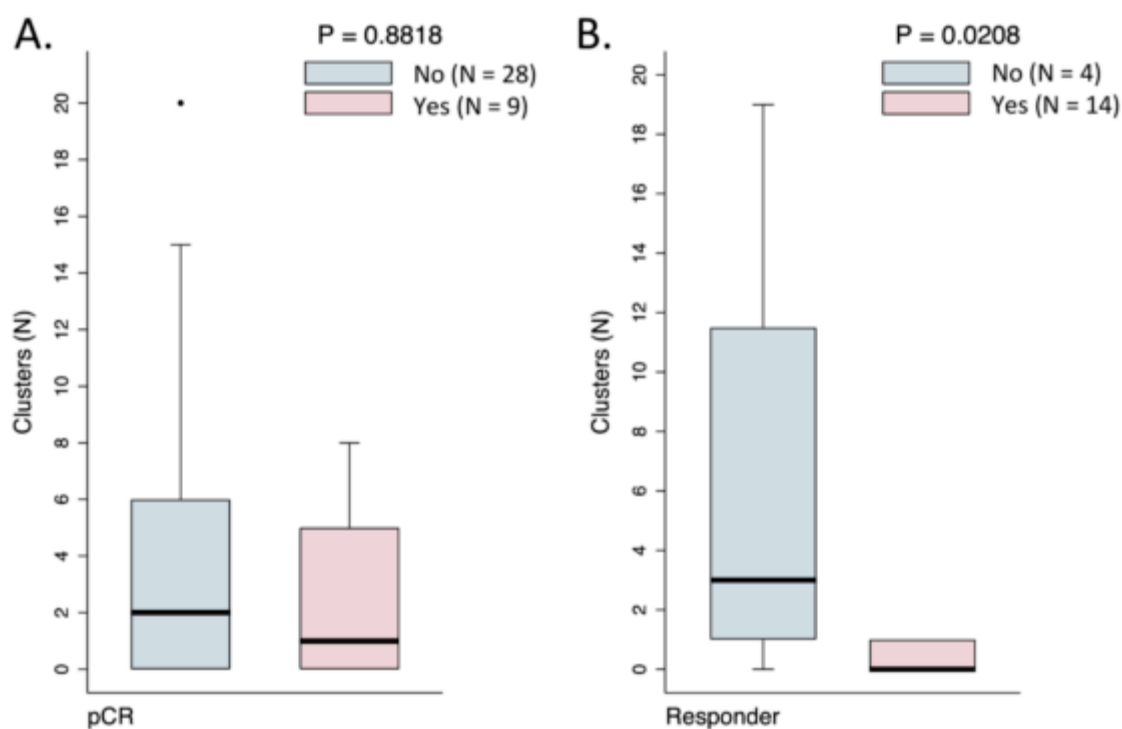

**Figure S3.** Association of CTC-clusters with outcome in EBC patients. Boxplots reporting the number of CTC-clusters detected (A) in samples collected at baseline, according to the pathological complete response (pCR) evaluation ('no' = patients who did not reach pCR, light-blue bar; 'yes' = patients who reached pCR, violet bar); and (B) in samples collected after surgery, in responder versus non-responder patients ('no' = patients not achieving down-staging, light-blue bar; 'yes' = patients where a down-staging was achieved after NAC, violet bar). A higher post-surgery number of clusters was detectable in patients with no tumor shrinkage after primary chemotherapy.
